# Supplementary material for: A Novel Salivary Sensor with Integrated Au Electrodes and Conductivity Meters for Screening of Diabetes
Source: MDPI journal article supplement (doi:10.3390/bios13070702), 2023-07-02
Supplement: s1 [file s1]

## Supplemental Materials

C-W Lin, Y-H Tsai and Y-S Peng, et al. A Novel Salivary Sensor with Integrated Au Electrodes and Conductivity Meters for Screening of Diabetes

### Content

**Table S1.** Normality tests of the sample data in Table 1 using Kolmogorov-Smirnov method

**Table S2.** Normality tests of the sample data in Table 2 using Kolmogorov-Smirnov method

**Table S3.** Baseline characteristics of male participants stratified by Diabetes (n=126)

**Table S4.** Baseline characteristics of female participants stratified by Diabetes (n=269)

**Table S5.** Comparison of demographics and laboratory parameters between diabetes and non-diabetes after propensity-score matching (n = 230).

**Figure S1.** Distribution plots of salivary conductivity among different groups

**Table S1.** Normality tests of the sample data in Table 1 using Kolmogorov-Smirnov method

|                                           | <b>DM<br/>(N=46)</b> | <b>P value</b> | <b>Non-DM<br/>(N=349)</b> | <b>P value</b> |
|-------------------------------------------|----------------------|----------------|---------------------------|----------------|
| <b>Salivary conductivity, ms/cm</b>       | 6.29±1.58            | 0.64           | 5.48±1.59                 | <0.01          |
| <b>Demographics</b>                       |                      |                |                           |                |
| Age, years                                | 56.96±6.78           | <0.01          | 51.10±11.61               | <0.01          |
| Gender (male), n (%)                      | 15 (32.7)            | NA             | 111 (31.8)                | NA             |
| Body weight, kg                           | 70.41±12.90          | 0.57           | 63.65±12.29               | <0.01          |
| Body height, cm                           | 160.66±7.94          | 0.64           | 160.65±7.83               | <0.01          |
| Body mass index, kg/m <sup>2</sup>        | 27.19±4.01           | 0.35           | 24.60±4.08                | <0.01          |
| Systolic blood pressure, mmHg             | 138.87±24.84         | 0.23           | 126.97±20.26              | <0.01          |
| Diastolic blood pressure, mmHg            | 82.24±12.61          | 0.79           | 78.26±12.55               | 0.09           |
| <b>Comorbid conditions, n (%) @</b>       |                      |                |                           |                |
| Known history of DM                       | 26 (56.5)            | NA             | 20 (5.7)                  | NA             |
| Hypertension                              | 19 (41.3)            | NA             | 76 (21.8)                 | NA             |
| Dyslipidemia                              | 10 (21.7)            | NA             | 37 (10.6)                 | NA             |
| Gout                                      | 1 (2.2)              | NA             | 10 (2.9)                  | NA             |
| <b>Laboratory parameters</b>              |                      |                |                           |                |
| BUN, mg/dL                                | 14.85±4.65           | 0.11           | 13.86±4.03                | <0.01          |
| Creatinine, mg/dL                         | 0.73±0.16            | 0.01           | 0.74±0.16                 | <0.01          |
| eGFR, mL/min/1.73 m <sup>2</sup>          | 101.97±22.20         | 0.18           | 101.49±21.08              | <0.01          |
| Serum osmolality, mOsm/kgH <sub>2</sub> O | 294.91±5.94          | <0.01          | 290.95±6.58               | <0.01          |
| Fasting glucose, mg/dL                    | 170.15±56.35         | <0.01          | 100.26±21.47              | <0.01          |
| Hemoglobin A1c, %                         | 7.80±1.51            | <0.01          | 5.63±0.35                 | <0.01          |

Values are expressed as mean ± standard deviation or number (percentage). @ The information on comorbid conditions was obtained by questionnaires. Abbreviations: BUN, blood urea nitrogen; eGFR, estimated glomerular filtration rate; DM, diabetes mellitus; NA, not applicable. P value < 0.05 indicates that the data is not normally distributed.

**Table S2.** Normality tests of the sample data in Table 2 using Kolmogorov-Smirnov method

|                                           | Low salivary<br>conductivity<br>group (N=251) | P value | High salivary<br>conductivity<br>group (N=144) | P value |
|-------------------------------------------|-----------------------------------------------|---------|------------------------------------------------|---------|
| <b>Salivary conductivity, ms/cm</b>       | 4.57±0.81                                     | <0.01   | 7.33±1.06                                      | <0.01   |
| <b>Demographics</b>                       |                                               |         |                                                |         |
| Age, years                                | 50.57±11.35                                   | <0.01   | 53.90±10.95                                    | <0.01   |
| Gender (male), n (%)                      | 79 (31.5)                                     | NA      | 47 (32.6)                                      | NA      |
| Body weight, kg                           | 62.47±11.32                                   | <0.01   | 67.85±13.79                                    | 0.20    |
| Body height, cm                           | 160.37±7.44                                   | 0.22    | 161.15±8.49                                    | <0.01   |
| Body mass index, kg/m <sup>2</sup>        | 24.23±3.67                                    | <0.01   | 26.07±4.65                                     | <0.01   |
| Systolic blood pressure, mmHg             | 125.81±20.06                                  | <0.01   | 132.80±22.32                                   | <0.01   |
| Diastolic blood pressure, mmHg            | 77.76±12.46                                   | 0.17    | 80.40±12.73                                    | 0.33    |
| <b>Comorbid conditions, n (%) @</b>       |                                               |         |                                                |         |
| Known history of DM                       | 17 (6.8)                                      | NA      | 29 (20.1)                                      | NA      |
| Hypertension                              | 51 (20.3)                                     | NA      | 44 (30.6)                                      | NA      |
| Dyslipidemia                              | 23 (9.2)                                      | NA      | 24 (16.7)                                      | NA      |
| Gout                                      | 7 (2.8)                                       | NA      | 4 (2.8)                                        | NA      |
| <b>Laboratory parameters</b>              |                                               |         |                                                |         |
| BUN, mg/dL                                | 13.71±4.20                                    | <0.01   | 14.44±3.93                                     | <0.01   |
| Creatinine, mg/dL                         | 0.73±0.16                                     | <0.01   | 0.76±0.16                                      | <0.01   |
| eGFR, mL/min/1.73 m <sup>2</sup>          | 103.20±20.48                                  | <0.01   | 98.65±22.14                                    | <0.01   |
| Serum osmolality, mOsm/kgH <sub>2</sub> O | 291.09±6.83                                   | <0.01   | 291.97±6.23                                    | <0.01   |
| Fasting glucose, mg/dL                    | 105.02±33.83                                  | <0.01   | 114.30±38.12                                   | <0.01   |
| Hemoglobin A1c, %                         | 5.77±0.88                                     | <0.01   | 6.08±1.00                                      | <0.01   |

Values are expressed as mean ± standard deviation or number (percentage). @ The information on comorbid conditions was obtained by questionnaires. Abbreviations: BUN, blood urea nitrogen; eGFR, estimated glomerular filtration rate; DM, diabetes mellitus; NA, not applicable. P value < 0.05 indicates that the data is not normally distributed.

**Table S3.** Baseline characteristics of male participants stratified by Diabetes (n=126)

|                                           | <b>Male<br/>(N=126)</b> | <b>DM<br/>(N=15)</b> | <b>Non-DM<br/>(N=111)</b> | <b>P value</b> |
|-------------------------------------------|-------------------------|----------------------|---------------------------|----------------|
| <b>Salivary conductivity, ms/cm</b>       | 5.65±1.56               | 6.48±1.31            | 5.53±1.56                 | 0.02           |
| <b>Demographics</b>                       |                         |                      |                           |                |
| Age, years                                | 51.76±11.78             | 54.87±7.26           | 51.34±12.23               | 0.12           |
| Body weight, kg                           | 72.07±12.61             | 77.80±11.60          | 71.30±12.59               | 0.06           |
| Body height, cm                           | 168.37±6.47             | 168.39±6.09          | 168.37±6.55               | 0.99           |
| Body mass index, kg/m <sup>2</sup>        | 25.37±3.81              | 27.39±3.28           | 25.09±3.81                | 0.02           |
| Systolic blood pressure, mmHg             | 132.79±18.65            | 142.27±18.51         | 131.51±18.37              | 0.05           |
| Diastolic blood pressure, mmHg            | 81.47±12.72             | 86.73±12.94          | 80.76±12.58               | 0.11           |
| <b>Comorbid conditions, n (%) @</b>       |                         |                      |                           |                |
| Known history of DM                       | 16 (12.7)               | 5 (33.3)             | 11 (9.9)                  | <0.01          |
| Hypertension                              | 35 (27.8)               | 5 (33.3)             | 30 (27.0)                 | 0.61           |
| Dyslipidemia                              | 14 (11.1)               | 1 (6.7)              | 13 (11.7)                 | 0.49           |
| Gout                                      | 9 (7.1)                 | 1 (6.7)              | 8 (7.2)                   | 0.94           |
| <b>Laboratory parameters</b>              |                         |                      |                           |                |
| BUN, mg/dL                                | 14.29±3.78              | 14.61±4.39           | 14.25±3.71                | 0.76           |
| Creatinine, mg/dL                         | 0.90±0.15               | 0.84±0.19            | 0.90±0.14                 | 0.24           |
| eGFR, mL/min/1.73 m <sup>2</sup>          | 98.24±21.30             | 106.84±27.12         | 97.08±20.26               | 0.20           |
| Serum osmolality, mOsm/kgH <sub>2</sub> O | 292.04±6.94             | 295.47±4.73          | 291.58±7.08               | <0.01          |
| Fasting glucose, mg/dL                    | 107.43±33.81            | 158.20±48.94         | 100.57±24.39              | <0.01          |
| Hemoglobin A1c, %                         | 5.88±0.72               | 7.38±0.94            | 5.68±0.35                 | <0.01          |

Values are expressed as mean ± standard deviation or number (percentage). @ The information on comorbid conditions was obtained by questionnaires. Abbreviations: BUN, blood urea nitrogen; eGFR, estimated glomerular filtration rate; DM, diabetes mellitus.

**Table S4.** Baseline characteristics of female participants stratified by Diabetes (n=269)

|                                           | Female<br>(N=269) | DM<br>(N=31) | Non-DM<br>(N=238) | P value |
|-------------------------------------------|-------------------|--------------|-------------------|---------|
| <b>Salivary conductivity, ms/cm</b>       | 5.55±1.64         | 6.29±1.58    | 5.48±1.59         | <0.01   |
| <b>Demographics</b>                       |                   |              |                   |         |
| Age, years                                | 51.79±11.10       | 57.97±6.42   | 50.99±11.33       | <0.01   |
| Body weight, kg                           | 60.85±10.79       | 66.84±12.09  | 60.08±10.39       | <0.01   |
| Body height, cm                           | 157.04±5.44       | 156.92±5.74  | 157.05±5.41       | 0.91    |
| Body mass index, kg/m <sup>2</sup>        | 24.68±4.29        | 27.09±4.36   | 24.37±4.18        | <0.01   |
| Systolic blood pressure, mmHg             | 126.28±21.96      | 137.23±27.51 | 124.86±20.78      | 0.02    |
| Diastolic blood pressure, mmHg            | 77.44±12.37       | 80.06±12.06  | 77.10±12.39       | 0.21    |
| <b>Comorbid conditions, n (%) @</b>       |                   |              |                   |         |
| Known history of DM                       | 30 (11.2)         | 21 (67.7)    | 9 (3.4)           | <0.01   |
| Hypertension                              | 60 (22.3)         | 13 (41.9)    | 47 (19.7)         | <0.01   |
| Dyslipidemia                              | 33 (12.3)         | 9 (29.0)     | 24 (10.1)         | <0.01   |
| Gout                                      | 2 (0.7)           | 0 (0)        | 2 (0.8)           | -       |
| <b>Laboratory parameters</b>              |                   |              |                   |         |
| BUN, mg/dL                                | 13.82±4.26        | 14.97±4.84   | 13.68±4.17        | 0.16    |
| Creatinine, mg/dL                         | 0.68±0.11         | 0.67±0.12    | 0.67±0.10         | 0.88    |
| eGFR, mL/min/1.73 m <sup>2</sup>          | 103.09±20.99      | 99.61±19.45  | 103.54±21.18      | 0.30    |
| Serum osmolality, mOsm/kgH <sub>2</sub> O | 291.12±6.47       | 294.65±6.50  | 290.66±6.33       | <0.01   |
| Fasting glucose, mg/dL                    | 108.86±36.59      | 175.94±59.49 | 100.12±20.02      | <0.01   |
| Hemoglobin A1c, %                         | 5.88±1.01         | 8.01±1.70    | 5.61±0.35         | <0.01   |

Values are expressed as mean ± standard deviation or number (percentage). @ The information on comorbid conditions was obtained by questionnaires. Abbreviations: BUN, blood urea nitrogen; eGFR, estimated glomerular filtration rate; DM, diabetes mellitus

**Table S5.** Comparison of demographics and laboratory parameters between diabetes and non-diabetes after propensity-score matching (n = 230).

|                                           | <b>DM<br/>(N=46)</b> | <b>Non-DM<br/>(N=184)</b> | <b>P value</b> |
|-------------------------------------------|----------------------|---------------------------|----------------|
| <b>Salivary conductivity, ms/cm</b>       | 6.29±1.58            | 5.46±1.49                 | <0.01          |
| <b>Demographics</b>                       |                      |                           |                |
| Age, years                                | 56.96±6.78           | 57.95±5.52                | 0.30           |
| Gender (male), n (%)                      | 15 (32.7)            | 61 (33.2)                 | 0.94           |
| Body weight, kg                           | 70.41±12.90          | 65.89±11.66               | 0.02           |
| Body height, cm                           | 160.66±7.94          | 159.67±7.67               | 0.43           |
| Body mass index, kg/m <sup>2</sup>        | 27.19±4.01           | 25.78±3.87                | 0.03           |
| Systolic blood pressure, mmHg             | 138.87±24.84         | 135.24±19.57              | 0.36           |
| Diastolic blood pressure, mmHg            | 82.24±12.61          | 81.26±11.77               | 0.62           |
| <b>Comorbid conditions, n (%)</b>         |                      |                           |                |
| Known history of DM                       | 26 (56.5)            | 16 (8.7)                  | <0.01          |
| Hypertension                              | 19 (41.3)            | 68 (37.0)                 | 0.79           |
| Ischemic heart disease/ Stroke            | 0 (0)                | 1 (0.5)                   | 1.00           |
| Dyslipidemia                              | 10 (21.7)            | 30 (16.3)                 | 0.40           |
| Gout                                      | 1 (2.2)              | 8 (4.3)                   | 0.47           |
| <b>Laboratory parameters</b>              |                      |                           |                |
| BUN, mg/dL                                | 14.85±4.65           | 14.46±4.02                | 0.57           |
| Creatinine, mg/dL                         | 0.73±0.16            | 0.74±0.16                 | 0.49           |
| BUN/Cr ratio                              | 21.04±7.07           | 20.05±6.39                | 0.36           |
| eGFR, mL/min/1.73 m <sup>2</sup>          | 101.97±22.20         | 98.47±20.44               | 0.31           |
| Serum osmolality, mOsm/kgH <sub>2</sub> O | 294.91±5.94          | 292.17±6.54               | 0.01           |
| Fasting glucose, mg/dL                    | 170.15±56.35         | 103.71±21.98              | <0.01          |
| Hemoglobin A1c, %                         | 7.80±1.51            | 5.73±0.33                 | <0.01          |
| ALT, U/L                                  | 30.83±17.49          | 24.05±13.68               | 0.02           |
| Triglyceride, mg/dL                       | 181.30±114.53        | 125.73±71.83              | <0.01          |
| Total cholesterol, mg/dL                  | 195.39±40.56         | 201.78±38.29              | 0.32           |
| LDL-C, mg/dL                              | 111.67±35.11         | 120.85±35.62              | 0.12           |
| HDL-C, mg/dL                              | 48.74±13.28          | 55.89±14.43               | <0.01          |

Values are expressed as mean ± standard deviation or number (percentage). @ The information on comorbid conditions was obtained by questionnaires. Abbreviations: BUN, blood urea nitrogen; eGFR, estimated glomerular filtration rate; DM, diabetes mellitis

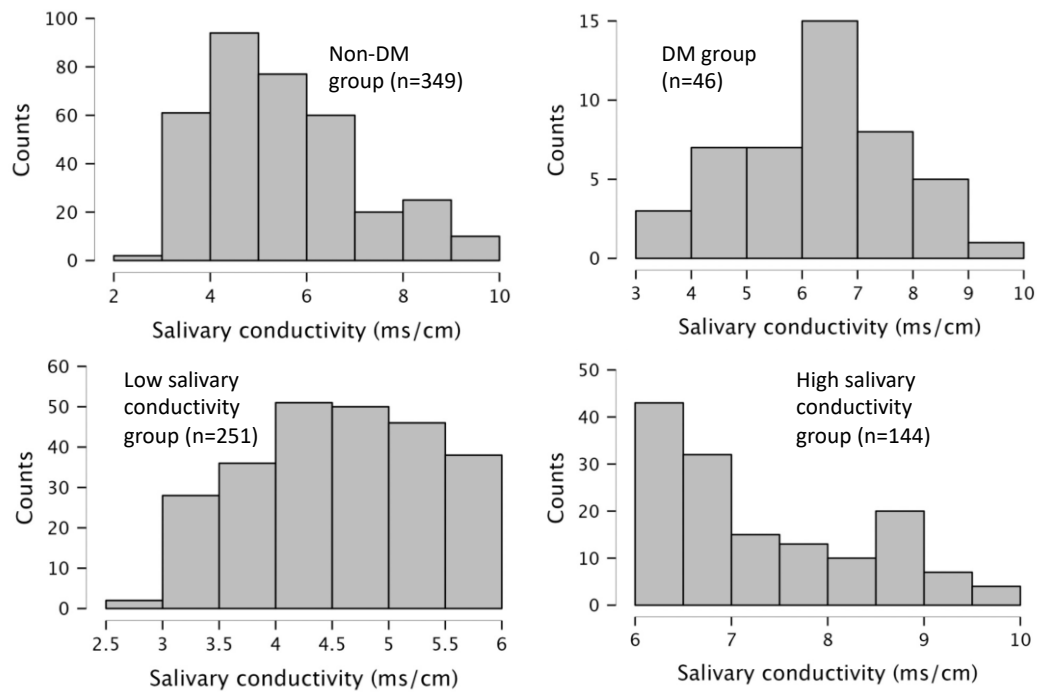

**Figure S1.** Distribution plots of salivary conductivity among different groups
